# Supplementary material
Source: Springer Nature journal article supplement (https://www.springermedizin.de/resource/supplementary/12986_2006_90_MOESM3_ESM.pdf/25655344)

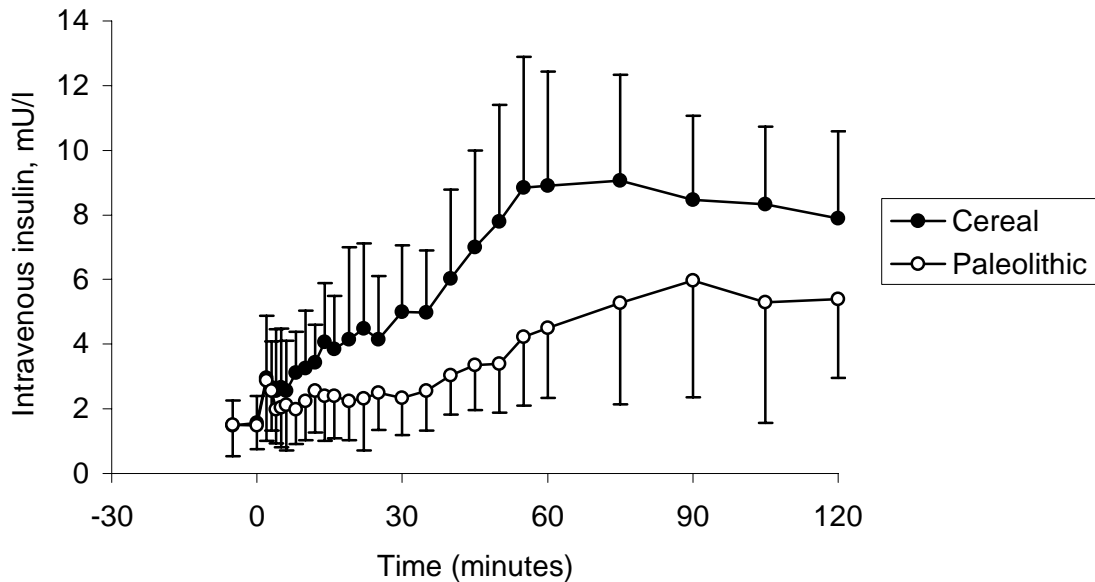

Supplement: MOESM3 [file 25655344]
